1  
2  
3  
4  
5  
6  
7  
8  
9  
10  
11  
12  
13  
14  
15  
16  
17  
18  
19  
20  
21  
22  
23  
24  
25  
26  
27  
28  
29

# Probing the neural dynamics of mnemonic representations in humans

Wei Liu<sup>1</sup>, Nils Kohn<sup>1</sup>, Guillén Fernández<sup>1</sup>

1. Donders Institute for Brain, Cognition and Behaviour, Radboud University Medical Centre, Nijmegen, The Netherlands

**Correspondence:**

Wei Liu  
Department of Cognitive Neuroscience  
Donders Institute for Brain, Cognition and Behaviour  
Radboud University Medical Centre  
Trigon Building, Kapittelweg 29  
6525 EN Nijmegen, The Netherlands  
Tel: +31 (0)24 36 53276  
E-mail: [W.Liu@donders.ru.nl](mailto:W.Liu@donders.ru.nl)

30 **Abstract** (200/200 words)

31 Memories are not stored as static engrams, but as dynamic representations affected by processes occurring  
32 after initial encoding or even consolidation. How the modulation of memory traces after their formation is  
33 reflected in the neural activity during subsequent retrieval is currently not well understood. Using fMRI in  
34 27 healthy human participants, we probed how neural representations of associative memories are  
35 dynamically modulated by two behavioral techniques that can either strengthen or weaken memories after  
36 encoding. Behaviorally, we demonstrated that, after an initial delay of 24 hours, associative memories can  
37 still be strengthened or weakened by repeated retrieval or suppression, respectively. Neurally, we show  
38 that repeated retrieval dynamically reduced activity amplitude in ventral visual cortex and hippocampus,  
39 but enhanced the distinctiveness of activity patterns in the ventral visual cortex. Critically, a larger  
40 reduction of activity amplitude in the ventral visual cortex associated with larger enhancement of  
41 distinctiveness of activity patterns in the same region. In contrast, repeated memory suppression was  
42 associated with reduced lateral prefrontal activity, but relative intact activity patterns. These results reveal  
43 dynamic adaptations of mnemonic representations in the human brains and how retrieval-related activity  
44 amplitude and distinctiveness of activation patterns change as a function of strengthening or weakening.

45

46

47

48

49

50

51

52

## 53 1. INTRODUCTION

54 Historically, memories were seen as more or less stable traces or engrams. After initial formation, memory  
55 traces are affected by consolidation leading to stabilization and weakening leading to forgetting  
56 (Ebbinghaus, 1885; Lashley, 1950; Müller and Pilzecker, 1900). However, contemporary research has  
57 provided ample evidence showing that memories continue to be dynamically adapted after initial encoding  
58 and consolidation and thus, can be modified by external factors beyond consolidation throughout their  
59 existence. For instance, retrieval practice can reinforce memory traces (Karpicke and Roediger, 2008),  
60 promote meaningful learning (Karpicke and Blunt, 2011), and protect memory retrieval against acute  
61 stress (Smith et al., 2016). In contrast, retrieval suppression can prevent unwanted memories to be  
62 retrieved (Anderson and Green, 2001), and reduce their emotional impact (Gagnepain et al., 2017).  
63 However, studies probing the neural basis of this dynamic process focused mostly on the mechanisms of  
64 modulation. How the modulation of memory traces after their formation is reflected in the neural activity  
65 during subsequent retrieval is currently not well understood. Here, we sought to characterize dynamically  
66 adapted mnemonic representations in humans by tracking the neural representations of the original  
67 memory. Memories were on the one hand reinforced by repeated memory retrieval and on the other hand,  
68 weakened by repeated memory suppression. This provides a window into the dynamically changing neural  
69 representations of memories.

70 The first challenge in tracking dynamically changing memory representations in humans is to characterize  
71 them noninvasively during memory retrieval. Memory representations and their dynamics can be  
72 potentially measured by changes in levels of activity amplitude (i.e., univariate analysis) or activation  
73 patterns (i.e., multivariate pattern analysis) based on the blood-oxygen-level-dependent (BOLD) signals  
74 using functional magnetic resonance imaging (fMRI). Successful retrieval of visual experiences is  
75 associated with increased activity amplitude in perceptual (Kosslyn et al., 1997; O'Craven and Kanwisher,  
76 2000; Wheeler et al., 2000) and mnemonic regions (Kuhl et al., 2010; Shohamy and Wagner, 2008),  
77 which are also active during initial perception. Post-encoding processes like consolidation can have

78 further influence on retrieval-related activity amplitude: hippocampal activity continued to decrease,  
79 whereas activity in the medial prefrontal region increased (Takashima et al., 2009, 2006). Although these  
80 univariate analyses of activity amplitude have revealed the spatial-temporal features of human brain  
81 networks involved in memory retrieval, multivariate pattern analysis (MVPA) (Cohen et al., 2017) of  
82 activation patterns during memory retrieval can better capture individual memory representation (Xue,  
83 2018). A large body of literature indicates that successful memory retrieval involves the reactivation of  
84 local fine-grained activity patterns that were present when the stimulus was initially processed in stimulus-  
85 specific perceptual and stimulus-general mnemonic regions (Chen et al., 2017; Lee et al., 2018; Polyn et  
86 al., 2005; Wimber et al., 2015). To probe changing memory representations, we tracked retrieval-related  
87 neural dynamics of both activity amplitude and activity patterns associated with repeated retrieval and  
88 memory suppression.

89 Next, if both reactivated activity amplitude and patterns carry mnemonic information during retrieval, do  
90 they jointly or independently change as a function of post-encoding modulation? Preliminary evidence  
91 suggests that activity amplitude and activity patterns may carry complementary information (Jimura and  
92 Poldrack, 2012), and evidence from visual expectation research supports this idea (de Lange et al., 2018;  
93 Kok et al., 2012). Activity amplitude in V1 is suppressed by prior expectation, while the activity pattern of  
94 the same area become more distinct, potentially carrying more fine-grained perceptual information (Kok  
95 et al., 2012). Here, activity amplitude and pattern of the same region were separately modulated by  
96 expectation. However, similar empirical evidence regarding the relationship between activity  
97 amplitude/patterns and memory retrieval is lacking. Therefore, we reasoned that similar to the findings in  
98 visual expectation, memory traces strengthened by repeated retrieval are accompanied by overall reduced  
99 activity amplitude, yet more distinct activity patterns. In contrast, weakened memory traces may be  
100 associated with opposite neural changes, that is, higher activity amplitude, but less distinct activity pattern.

101 The third challenge of measuring changing mnemonic representations is to disentangle neural activities  
102 associated with memory cues presented at test and activity associated with reactivated mental images.

103 Processing of visual memory cues can elicit perception-related neural activity, for instance, in visual areas.  
104 At the same time, retrieval of vivid visual experiences can be associated with retrieval-related neural  
105 reactivation in the same regions. The challenge is to disentangle coexisting representations of visual and  
106 mnemonic information in the same region (Rademaker et al., 2019). One method to separate these two  
107 processes is to use two perceptual modalities (e.g. sounds as memory cues, and pictures as information to  
108 be retrieved)(Bosch et al., 2014). Here, using the same modality, we used highly similar memory cues  
109 across different memory associations. Thus, most of the variances in activity patterns of visual areas  
110 would be associated with retrieval-related neural reactivation. Furthermore, we reasoned that the  
111 behavioral modulation implemented would mainly alter retrieval-related instead of perception-related  
112 activity and patterns. We used a multivariate activity pattern-based index to quantify the fidelity of neural  
113 representation of retrieved “mental images”. Across different memory associations, higher distinctiveness  
114 of neural representations (i.e., higher activity pattern variability) in visual or mnemonic regions is  
115 associated with more distinctive “mental images”.

116 In sum, our primary goal is to reveal if two behavioral techniques (memory retrieval and suppression)  
117 differently modulate neural reactivation of associative memories, and if such modulation results in altered  
118 memory representations detected by fMRI. A better understanding of these neural dynamics would lead to  
119 deeper insights into how established memories are dynamically transformed by experience (Xue, 2018).  
120 To this end, 27 healthy participants underwent a two-session functional MRI (fMRI) experiment (Figure  
121 1A). To localize areas for MVPA in the visual system, and to familiarize participants with the pictures of  
122 the to-be-remembered associations, we instructed participants to perform initially a familiarization task  
123 (Figure 1B) in which they sequentially viewed each of the 48 pictures used in the subsequent study phase.  
124 There, subjects intentionally memorized a series of 48 picture-location associations (Figure 1C) and  
125 returned 24h later for the fMRI session covering two experimental phases. A modulation phase  
126 (Think/No-Think paradigm (Benjamin J Levy and Anderson, 2012)) during which participants were cued  
127 to retrieve one-third of the associations (retrieval) or to avoid retrieving the associated images for another

128 third of associations (suppression). The remaining one-third of the associations were not cued during this  
129 phase and served as controls (Figure 1D). In the following test phase, subjects performed a final memory  
130 test during which all associations were cued once more to be retrieved (Figure 1E). We first investigated  
131 the possibility that associative memories can still be modulated after 24 hours. Behaviorally, we asked  
132 whether repeated retrieval and memory suppression would oppositely strengthen or weaken original  
133 memory traces. Next, using fMRI, we examined whether retrieval and suppression would modify neural  
134 reactivation of memories: first, we asked whether retrieval alters neural activity amplitude and pattern  
135 variability of memory representations in visual and mnemonic areas compared to control associations.  
136 And second, we tested whether memory suppression would modulate the same two neural measures, but  
137 in the opposite way.

138

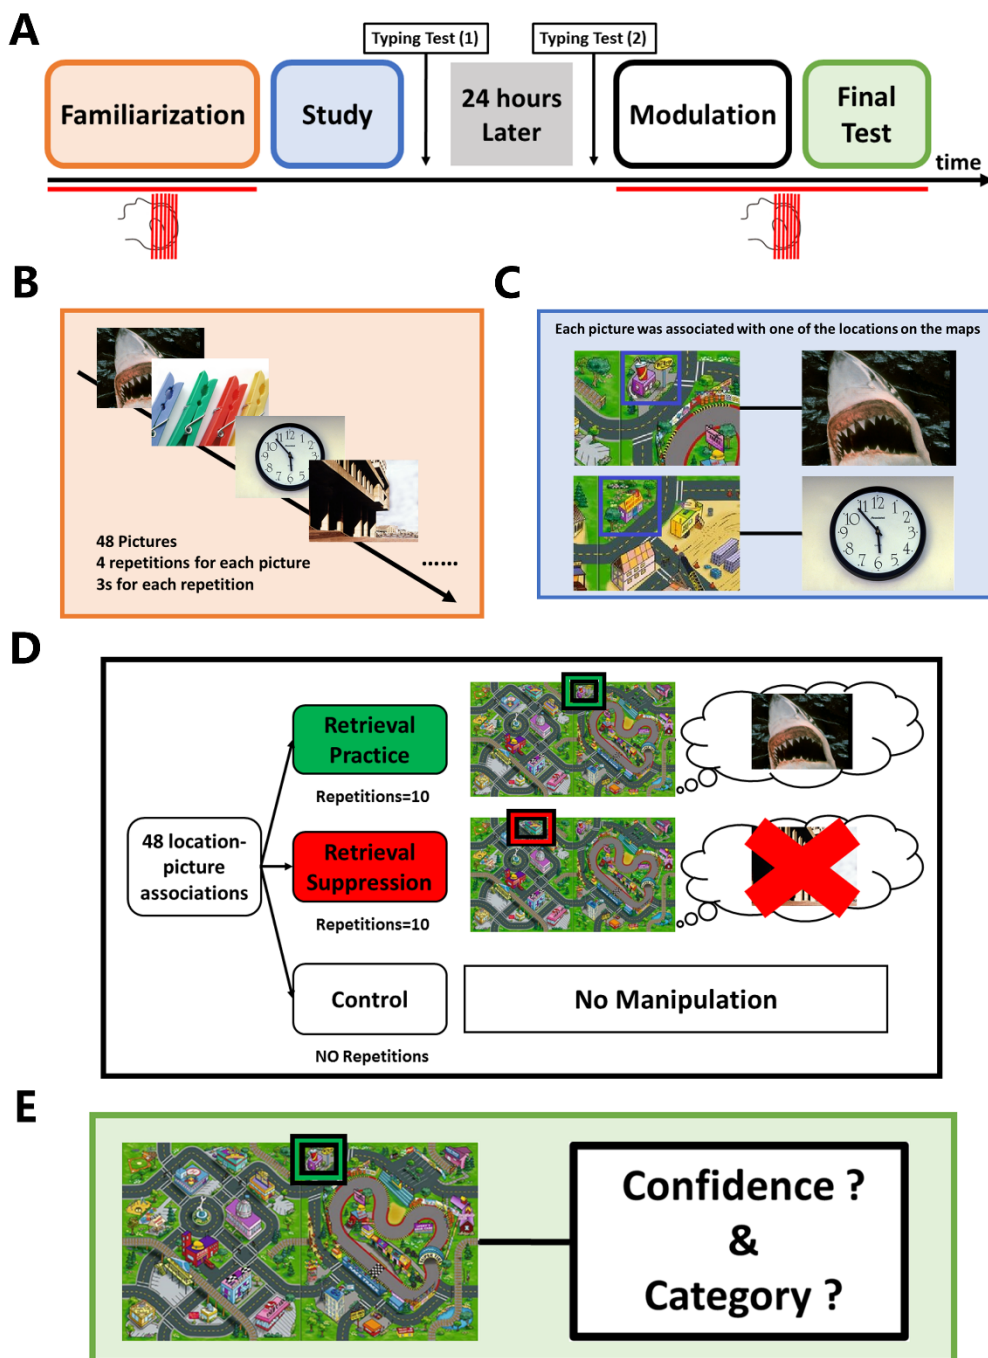

139

140 **Figure 1 Schematic of the experiment design.** (A) Timeline of the two-day experimental procedures. Red lines below the  
 141 timeline indicate the tasks in the MRI scanner. (B) During the familiarization phase, all of the pictures of the to-be-remembered  
 142 associations were randomly presented four times for the familiarization and estimation of picture-specific activation patterns. To  
 143 keep participants focused, on each trial, they were instructed to categorize the picture shown as an animal, human, location, or  
 144 object. (C) Study phase. Participants were trained to associate memory cues with presented pictures. (D) Modulation phase. After  
 145 24 hours, we used the Think/No-Think paradigm to modulate consolidated associative memories. Participants were instructed to  
 146 actively retrieve associated pictures in mind (“retrieval”), or suppress the tendency to recall them (“suppression”) according to the  
 147 colors of the frames (GREEN: retrieval; RED: suppression) around locations. (E) Final memory test phase. Participants  
 148 performed the final memory test after the modulation. For each of the 48 location-picture associations, locations were presented  
 149 again, and participants were instructed to report the memory confidence and categorize the picture that came to mind.

## 150 **2. RESULTS**

### 151 **2.1. Behavioral results**

#### 152 *Pre-scan memory performance immediately after study and 24 hours later*

153 On day1, participants were instructed to memorize a series of sequentially presented location-picture  
154 associations, for which 48 distinct pictures (photographs) were presented together with 48 specific  
155 locations on two cartoon maps (Study Phase; Figure 1C). We selected pictures from four categories  
156 consisting of animal, human, scene (e.g. train station), and object (e.g. pen and notebooks), so that  
157 memory performance could be assessed within the scanner by instructing participants to indicate the  
158 picture's category when cued by the map location during the final memory test on day2 (Figure 1E). Each  
159 location-picture association was presented twice during this study phase (For details, See Experimental  
160 design, Online Methods). Thereafter, to assess participants' immediate memory performance, all locations  
161 were highlighted sequentially, in a random order, and participants were instructed to briefly describe the  
162 associated picture by typing down one or two sentences (Two raters evaluated these answers  
163 independently with high Cohen's kappa coefficient ( $\kappa$ ): 0.908 and 0.885 for day1 and day2 separately; For  
164 details, See Typing test phase, Online Methods). During the immediate typing test (day1), 88.01% of the  
165 associated pictures were described correctly (SD= 10.87%; range from 52% to 100%). Before scanning on  
166 day2, a second typing memory test was conducted to assess delayed memory performance after a 24 hours  
167 consolidation period. Twenty-four hours later, participants still recalled 82.15% of all associations (SD =  
168 13.87%; range from 50% to 100%). Although we observed less accurate memory 24 hours later ( $t=4.73$ ,  
169  $p<0.001$ ) (Figure S1), participants could still remember most location-picture associations well.

#### 170 *Behavioral performance during the modulation phase*

171 We used the think/no-think (TNT) paradigm (Modulation Phase; Figure 1D) with trial-by-trial reports of  
172 memory retrieval/suppression to modulate and monitor the individual memory trace of a particular  
173 association (Anderson et al., 2004; B. J. Levy and Anderson, 2012). During the modulation phase, one-



174 third of the associations belong to retrieval condition (“*Think condition*”), and another third of associations  
175 belong to the suppression condition (“*No-Think condition*”). The remaining one-third of associations were  
176 not presented during this phase (“*Control condition*”). After each retrieval trial or suppression trial,  
177 participants were instructed to use one of four response options (Never, Sometimes, Often, and Always) to  
178 access how frequent the associated picture was brought to mind when cued by the specific map location.  
179 For each association belongs to retrieval or suppression condition, the corresponding modulation was  
180 repeated for ten times throughout the experiment.

181 During retrieval trials, participants reported that associated pictures were successfully recalled on most of  
182 the trials (mean=84.05%, SD=11.79 %, range from 56.25% to 100%; Figure 2A). This number is close to  
183 the accuracy of the second typing test immediately before the modulation phase. Critically, we observed  
184 that with repeated attempts to retrieve, trial-by-trial retrieval frequency rating increased over repetitions,  
185 suggesting that pictures were more likely to stay stable ( $F [9,26]=5.77$ ,  $p<0.001$ ,  $\eta^2 =0.182$ ; Figure 2B).

186 For the analyses of suppression trials, we excluded all location-picture associations which the participant  
187 could not describe correctly immediately before the modulation phase (Typing Test Day2). This approach  
188 controlled for individual differences in memory for associations that could interfere with the analysis of  
189 memory suppression. On suppression trials, participants reported that they successfully suppressed the  
190 tendency to recall the associated pictures in about half of the trials (mean=50.62%, SD=25.35%, range  
191 from 4% to 92.5%; Figure 2C). As shown in think/no-think literature before (B. J. Levy and Anderson,  
192 2012), trial-by-trial intrusion frequency rating declined from the first to the tenth repetition ( $F$   
193  $[9,26]=4.837$ ,  $p<0.001$ ,  $\eta^2 =0.157$ ; Figure 2D). These results suggest that participants were successful at  
194 retrieving or suppressing memory traces according to tasks instructions.

#### 195 *Memory performance during the final test*

196 After the modulation phase, the final memory test was also performed while participants were scanned.  
197 On each trial, participants saw initially one of the 48 map locations serving as cues. Next, they rated the

198 confidence of their memory for the associated picture, and then classified the category of the recalled  
199 picture (Figure 1E). Therefore, for each location-picture association, we assessed both subjective  
200 (confidence rating) and objective (if they selected the correct category) memory. We also measured  
201 reaction time (RT) of the category judgment as a proxy for the speed of memory retrieval.

202 During the final test, participants, on average, selected the correct category (chance level=1/4) for the  
203 associated picture on 91.82% (SD = 6.05%; range from 70.83% to 100%) of the successfully recalled  
204 associations of the typing test day2 (mean=39.43). We then examined how repeated retrieval and  
205 suppression affected memory performance in the final test. We defined associations that were cued during  
206 modulation to retrieval as *RETRIEVAL ASSOCIATIONS* and associations that were cued to suppression  
207 retrieval as *SUPPRESSION ASSOCIATIONS*. The remaining third of associations were not cued during  
208 modulation and regarded as *CONTROL ASSOCIATIONS*.

209 First, we compared the recall accuracies between three kinds of associations. Analysis of objective recall  
210 accuracy after modulation showed no significant main effect of *modulation* ( $F [2,26]=0.524$ ,  $p=0.595$ ,  $\eta^2$   
211  $=0.02$ ; Figure 2E). Due to the lack of suppression-induced forgetting effect (lower accuracy for  
212 *SUPPRESSION ASSOCIATIONS* compared to *CONTROL ASSOCIATIONS*) at the group level, we further  
213 performed correlational analysis to associate performance during the memory suppression and the final  
214 memory test performance. More specifically, for each participant, we quantified the rate at which  
215 intrusions declined over repetitions during the modulation phase (*intrusion slope score*: the more negative  
216 the score is, more effective the participant can reduce intrusions; details in Online Methods) and  
217 suppression-induced forgetting effect by subtracting the objective retrieval accuracy of *SUPPRESSION*  
218 *ASSOCIATIONS* from *CONTROL ASSOCIATIONS* (*suppression score*: the more negative the score is,  
219 more below-control forgetting on the final test). We found that participants who were more effective in  
220 suppressing intrusions (higher intrusion slope score) during the modulation phase were the ones who show  
221 larger suppression-induced forgetting effects ( $r=0.411$ ,  $p=0.03$ ; Figure2F), suggesting that successful

222 retrieval suppression was subsequently associated with suppression-induced forgetting. This correlation  
 223 was also reported before in the think/no-think literature (B. J. Levy and Anderson, 2012).  
 224 Additionally, we investigated the effect of *modulation* on memory confidence and found a significant  
 225 main effect ( $F [2,26]=5.928$ ,  $p=0.005$ ,  $\eta^2 =0.186$ ; Figure 2G). Post-hoc analyses revealed higher recall  
 226 confidence for *RETRIEVAL ASSOCIATIONS* compared to the *CONTROL ASSOCIATIONS* ( $t=3.35$ ,  $p$   
 227  $_{\text{holm}}=0.007$ ) and a trend towards higher confidence compared to *SUPPRESSION ASSOCIATIONS* that just  
 228 failed to reach our threshold for statistical significance ( $t=2.172$ ,  $p_{\text{holm}}=0.07$ ). Finally, we asked if  
 229 modulation affected the speed of retrieval indexed by RT during the final test. Even though we did not  
 230 find a significant main effect of modulation ( $F [2,26]=2.905$ ,  $p=0.06$ ,  $\eta^2 =0.10$ ; Figure 2H), recall of  
 231 *RETRIEVAL ASSOCIATIONS* was faster compared to the recall of *CONTROL ASSOCIATIONS* ( $t=-2.486$ ,  
 232  $p=0.02$ ).

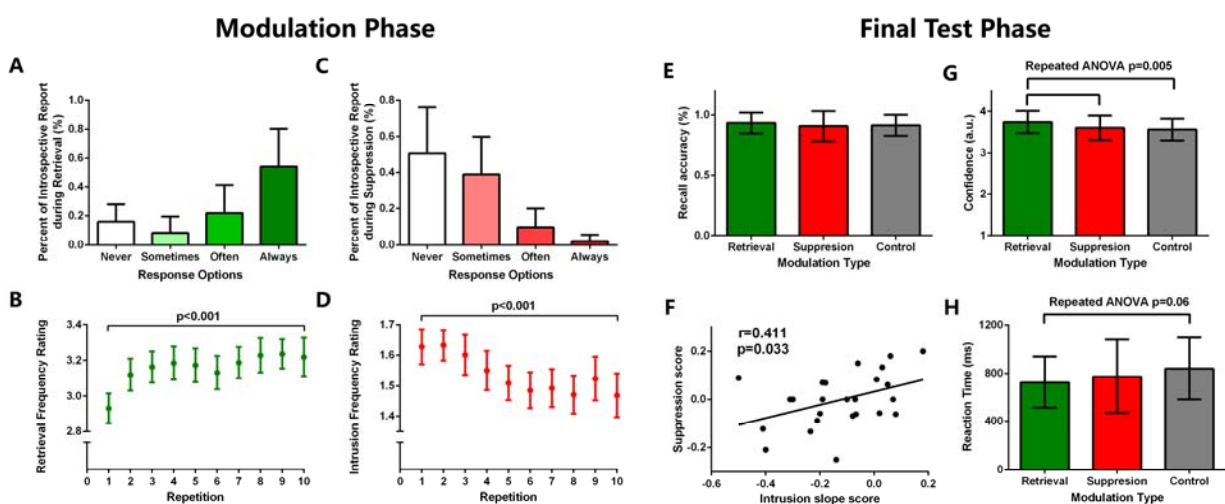

233  
 234 **Figure 2 Behavioral performance during modulation and final test phase.** (A) Percentage of the trial-by-trial introspective  
 235 report during the retrieval trials. For most of the retrieval trials (mean=84.05%, SD=11.79 %), associated pictures were  
 236 successfully recalled (sometimes+often+always). (B) With repeated retrieval attempts, associated pictures were more likely to  
 237 stay in mind stably ( $F=5.77$ ,  $p<0.001$ ). (C) Percentage of the trial-by-trial introspective report during the suppression trials.  
 238 During half of the suppression trials (mean=50.62%, SD=25.35%), participants successfully suppressed the tendency to recall the  
 239 associated pictures (never). (D) As the number of repetition of suppression increase, the possibility of suppression failure declined  
 240 ( $F=4.837$ ,  $p<0.001$ ). (E) There is no effect of retrieval or suppression on the accuracy of the categorization during the final test  
 241 ( $p=0.595$ ). (F) Participants who are more effective in reducing suppression failures (more negative the *Intrusion Slope Score*)  
 242 were the ones who show more evidence suppression-induced forgetting (more negative the *Suppression Score*). (G) For  
 243 *RETRIEVAL ASSOCIATIONS*, participants reported higher subjective confidence compared to *SUPPRESSION ASSOCIATIONS*  
 244 ( $t=2.172$ ,  $p_{\text{holm}}=0.07$ ), and *CONTROL ASSOCIATIONS* ( $t=3.35$ ,  $P_{\text{holm}}=0.007$ ). (H) For *RETRIEVAL ASSOCIATIONS*,  
 245 participants spent less time during categorization compared to the *CONTROL ASSOCIATIONS* ( $t=-2.486$ ,  $P=0.02$ ), and the effect  
 246 between three conditions tend to be significant ( $F=2.905$ ,  $p=0.06$ ). a.u.= arbitrary unit.

247

## 248 **2.2 fMRI results**

249 We aimed to assess differences in activity amplitude and activity patterns that are associated with the  
250 reported behavioral effects of repeated retrieval and memory suppression. For the analysis of activity  
251 amplitude, we used the standard whole-brain univariate General Linear Model (GLM) analysis,  
252 contrasting *RETRIEVAL ASSOCIATIONS* or *SUPPRESSION ASSOCIATIONS* with *CONTROL*  
253 *ASSOCIATIONS* separately.

254 For the analysis of activity patterns, we used a multivariate activity pattern-based neural index to measure  
255 the fidelity of pattern reactivation during retrieval. We assumed that the ventral visual cortex (VVC) and  
256 the hippocampus would demonstrate neural reactivation of picture-specific activity patterns during  
257 retrieval. First, using the data from the familiarization task, we identified areas (Figure 3A) within the  
258 VVC that are sensitive to picture-specific information during perception and demonstrated the neural  
259 pattern reactivations during memory retrieval 24 hours later (Details See Supplemental Texts and Figure  
260 S2-S4). The VVC mask together with the anatomically-defined bilateral hippocampus mask (Figure 3B)  
261 were regarded as regions-of-interest (ROIs). Second, trial-by-trial voxel-wise activity patterns of ROIs  
262 during modulation and the final memory test were extracted. To quantify distinctiveness of retrieved  
263 “mental images”, we calculated the activation pattern variability using Pearson correlation (Figure 3C).  
264 We hypothesized that high activity pattern variability (low pattern similarity measured by R-values)  
265 reflects neural reactivations of distinctive “mental images”. Here, we first report the effects of repeated  
266 retrieval on activity amplitude and activity patterns, and then the counterparts related to suppression.

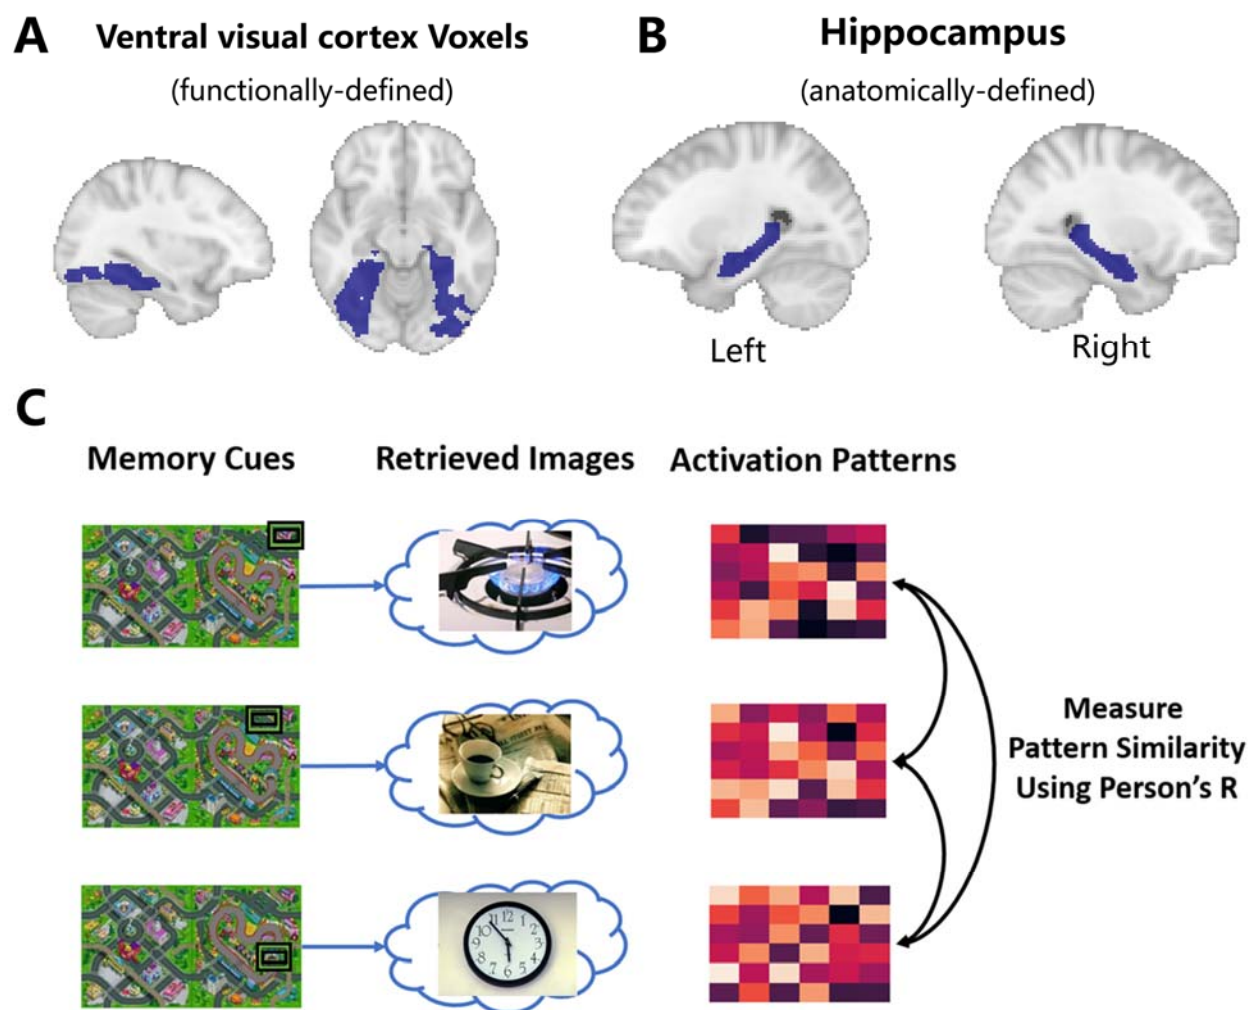

267

268 **Figure 3 Regions-of-interest (ROI) and rationale of the activity pattern variability analysis.** (A) Functionally-defined voxels  
 269 within the ventral visual cortex (VVC). We identified voxels whose activation patterns can be used to differentiate pictures that  
 270 were processed during the familiarization phase and were reactivated during successful memory retrieval during the final test  
 271 (Details in Supplemental Materials). (B) Anatomically-defined bilateral hippocampus ROI. (C) During the final test, “mental  
 272 images” were retrieved based on highly similar memory cues (different locations within maps were cued). We derived activation  
 273 patterns for each memory retrieval trials based on fMRI data, and then quantify the pattern variability across trials using Person’s  
 274  $r$ . Lower the similarity measure ( $r$ -value), higher the pattern variability.

275

276 **2.2.1 Repeated retrieval leads to reduced activity amplitude, but more distinct activity patterns**

277 *Repeated retrieval reduces the activity amplitude in the visual cortex and hippocampus*

278 Compared to *CONTROL ASSOCIATIONS*, retrieval of *RETRIEVAL ASSOCIATIONS* was associated with

279 less activation in medial occipital cortex, fusiform gyrus, supplementary motor area (SMA),

280 anterior/medial cingulate cortex (MCC), left precentral gyrus, precuneus, bilateral insula, and bilateral  
281 inferior frontal gyrus (IFG) (voxelwise  $P_{\text{uncorrected}} < 0.001$ ,  $p_{\text{FWE-cluster}} < 0.05$ ; Figure 4A; Figure S5; Table S1).  
282 Most of these regions are located within the anatomically-defined VVC. The whole-brain analysis did not  
283 show an effect of retrieval on the activity amplitude of hippocampal voxels under the same threshold.  
284 However, ROI-based analysis of hippocampal signal found reduced activity when retrieving *RETRIEVAL*  
285 *ASSOCIATIONS* compared to *CONTROL ASSOCIATIONS* (left hippocampus:  $t = -2.43$ ,  $p = 0.022$ ; Figure  
286 4E; right hippocampus:  $t = -2.18$ ,  $p = 0.038$ ; Figure 4G).

287 Next, we confirmed that the observed activity reduction in VVC and bilateral hippocampus is related to a  
288 linear decrease in activity with repeated retrieval using the data from the modulation phase. Specifically,  
289 we extracted the beta coefficient from the VVC cluster defined by the *RETRIEVAL* vs *CONTROL* contrast  
290 (as shown in Figure 3A) and the hippocampus for each run of the modulation phase and tested for the  
291 change in activity amplitude across runs. We found reduced VVC over repeated retrieval attempts ( $F [4, 25] = 6.95$ ,  
292  $p < 0.001$ ,  $\eta^2 = 0.218$ ; Figure 4B). Similarly, for the bilateral hippocampus, we observed a trend  
293 toward a gradual decrease of hippocampal signal across repetitions (left hippocampus:  $F [4, 25] = 2.39$ ,  
294  $p = 0.056$ ,  $\eta^2 = 0.087$ ; right hippocampus:  $F [4, 25] = 2.22$ ,  $p = 0.072$ ,  $\eta^2 = 0.082$ ).

295 *Repeated retrieval dynamically enhances the distinctiveness of activity patterns in the visual cortex, but*  
296 *not hippocampus*

297 We next examined whether the reduced activity amplitude was associated with reduced or enhanced  
298 distinctiveness of activity patterns during the final memory test. Focusing on the identified VVC areas and  
299 hippocampus (Figure 3A and 3B), we calculated the trial-by-trial activity pattern variability for  
300 *RETRIEVAL ASSOCIATIONS* and *CONTROL ASSOCIATIONS* separately. Results show that retrieval-  
301 related activity patterns for *RETRIEVAL ASSOCIATIONS* have increased variability in VVC compared to  
302 *CONTROL ASSOCIATIONS* ( $t = 2.3$ ,  $df = 26$ ,  $p = 0.029$ ; Figure 4C). However, we did not observe a similar  
303 effect in the hippocampus (left hippocampus:  $t = -0.91$ ,  $df = 26$ ,  $p = 0.36$ , Figure 4F; right hippocampus:  $t =$   
304  $0.456$ ,  $df = 26$ ,  $p = 0.65$ ; Figure 4H). To test the robustness of increased pattern variability for *RETRIEVAL*

305 *ASSOCIATIONS*, we performed the same contrast based on (1) all associations instead of only  
306 remembered association, the VVC areas defined by (2) different thresholds and (3) different classification  
307 labels. All control analyses yield the same result as the reported main analysis (*See Supplemental Text and*  
308 *Figure S6-S8*).

309 To characterize the dynamic modulation of activity pattern variability in the VVC, we further applied the  
310 same variability analysis to each run of the modulation phase and analyzed these pattern variability values  
311 using a 2×5 ANOVA (*modulation; run*; Figure 4D). We saw a significant main effect of the *run*, reflecting  
312 that pattern variability of the VVC increased with repetitions ( $F [4,25]=10.55, p<0.001, \eta^2 =0.297$ ). We  
313 also saw a main effect of *modulation*, reflecting that pattern variability of the *RETRIEVAL*  
314 *ASSOCIATIONS* is consistently higher than the variability of *SUPPRESSION ASSOCIATIONS* ( $F [1,$   
315  $25]=23.77, p<0.001, \eta^2 =0.487$ ). The interaction between modulation and runs just failed to be significant  
316 ( $F [4, 25]=2.427, p=0.053, \eta^2 =0.089$ ). This pattern of results suggests that increased pattern variability is  
317 not only the result of repetition: Even though memory cues of *SUPPRESSION ASSOCIATIONS* have also  
318 been presented ten times during the modulation, repeated retrieval more effectively enhanced pattern  
319 distinctiveness compared to suppression. We did not perform the same dynamic analysis to the  
320 hippocampal activity patterns because no effect was found in the final memory test.

321

322

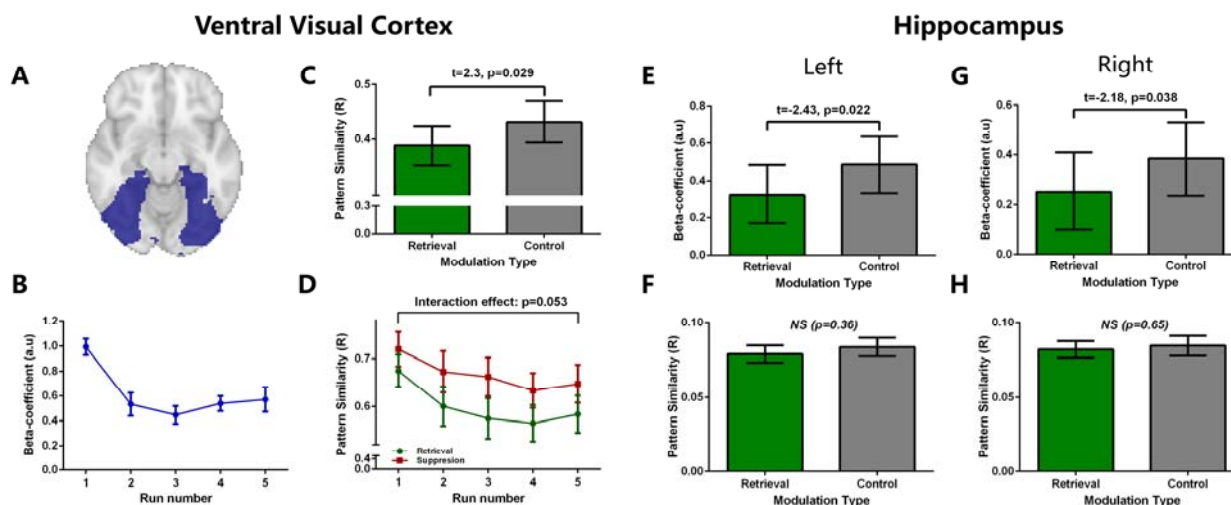

323

324 **Figure 4 Repeated retrieval dynamically modulated activity amplitude and patterns variability.** (A) During the final test,  
 325 compared to *CONTROL ASSOCIATIONS*, *RETRIEVAL ASSOCIATIONS* was associated with lower activity amplitude in several  
 326 brain regions, largely located within the ventral visual cortex (VVC)(whole-brain visualization in Figure S5). (B) The same VVC  
 327 cluster showed decreased activity amplitude over repetitions of retrieval during the modulation phase. (C) Higher activation  
 328 pattern variability (lower pattern similarity) in the VVC for *RETRIEVAL ASSOCIATIONS* compared to the *CONTROL*  
 329 *ASSOCIATIONS* during the final test ( $t=2.3$ ,  $p=0.029$ ). (D) Dynamically enhanced pattern variability in the VVC. For both  
 330 *RETRIEVAL ASSOCIATIONS* and *SUPPRESSION ASSOCIATIONS*, VVC's pattern variability increased over repetitions during  
 331 the modulation ( $F=11.12$ ,  $p<0.001$ ). However, repeated retrieval tends to more effectively enhance pattern variability compared to  
 332 suppression ( $F=2.42$ ,  $p=0.053$ ). (E) Reduced left hippocampal activity amplitude for *RETRIEVAL ASSOCIATIONS* compared to  
 333 *CONTROL ASSOCIATIONS* during the final test ( $t=-2.43$ ,  $p=0.022$ ). (F) No differences in left hippocampal activity pattern  
 334 variability between *RETRIEVAL ASSOCIATIONS* and *CONTROL ASSOCIATIONS* ( $p=0.36$ ) during the final test. (G) Reduced  
 335 right hippocampal activity amplitude for *RETRIEVAL ASSOCIATIONS* compared to *CONTROL ASSOCIATIONS* during the final  
 336 test ( $t=-2.18$ ,  $p=0.038$ ). (H) No differences in right hippocampal activity pattern variability between *RETRIEVAL*  
 337 *ASSOCIATIONS* and *CONTROL ASSOCIATIONS* ( $p=0.65$ ) during the final test.

338

339 *Reduced activity amplitude associated with enhanced distinctiveness of activity patterns in the visual*  
 340 *cortex*

341 Our activity amplitude and activity pattern variability analysis independently demonstrate that repeated  
 342 retrieval dynamically reduced activity amplitude, but enhances the distinctiveness of activity pattern in the  
 343 VVC. However, we performed these analyses at the whole-brain level and ROI level separately. To  
 344 further confirm the dissociation between the effects of repeated retrieval on activity amplitude and pattern  
 345 variability, we restricted our analyses to the same set of voxels within the VVC (Figure 5A), which  
 346 showed reduced activity amplitude during the final test and, at the same time carries picture-specific  
 347 information during perception and retrieval. Similar to our main analysis (as shown in Figure 4A and 4B),  
 348 we found reduced activity amplitude ( $t=5.823$ ,  $df=26$ ,  $p<0.001$ ; Figure 5B), but increased distinctiveness



349 of activity patterns (lower pattern similarity:  $t=2.887$ ,  $df=26$ ,  $p=0.007$ ; Figure 5C) in the same set of VVC  
350 voxels. Critically, participants who showed a larger reduction in activity amplitude were more likely to  
351 show a larger increase in the distinctiveness of patterns ( $r=0.524$ ,  $p=0.005$ ; Figure 5D).

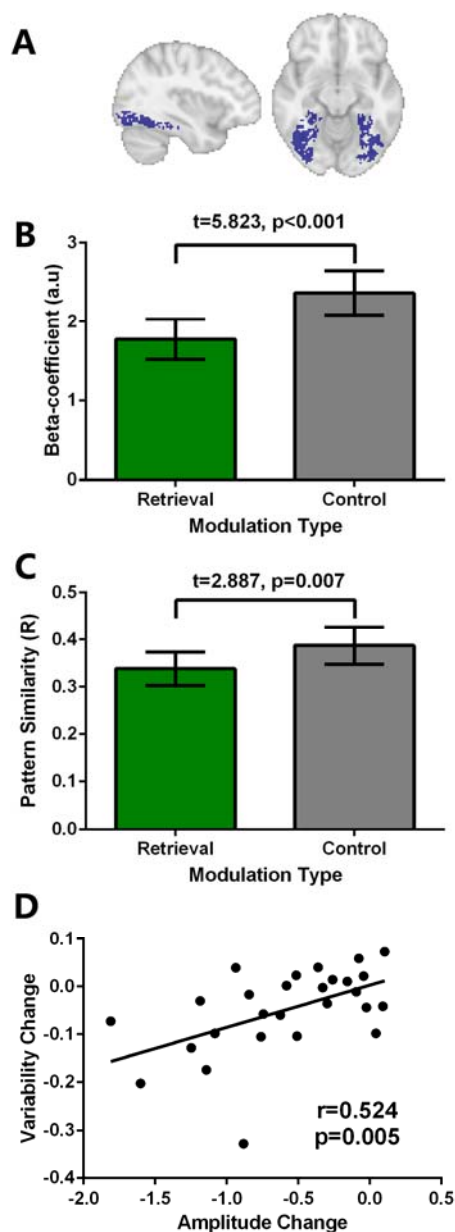

352

353 **Figure 5. Measuring both activity amplitude and distinctiveness of activity patterns in the ventral visual cortex.** (A) We  
354 identified overlapping voxels between activity amplitude and activation pattern analyses. First, these voxels showed reduced  
355 activity amplitude for *RETRIEVAL ASSOCIATIONS* during the final test. Second, these voxels demonstrated picture-specific  
356 activation patterns during both perception and retrieval. (B) Reduced activity amplitude of these voxels for *RETRIEVAL*  
357 *ASSOCIATIONS* compared to *CONTROL ASSOCIATIONS* during the final test ( $t=5.82$ ,  $p<0.001$ ). (C) Higher distinctiveness of  
358 activation patterns (lower pattern similarity) of these voxels for the *RETRIEVAL ASSOCIATIONS* compared to the *CONTROL*  
359 *ASSOCIATIONS* during the final test ( $t=2.88$ ,  $p=0.007$ ). (D) Across participants, the extent of activity amplitude reduction  
360 positively correlated with pattern distinctiveness enhancement ( $r=0.524$ ,  $p=0.005$ ).

361 **2.2.2 Retrieval suppression was associated with reduced of the lateral prefrontal activity**

362 *Weaker lateral prefrontal cortex (LPFC) activation as the result of retrieval suppression*

363 The contrast between retrieval of *SUPPRESSION ASSOCIATIONS* and *CONTROL ASSOCIATIONS*  
364 during the final test revealed decreased activation of only one cluster in the left LPFC ( $x=-52, y=38, z=16$ ,  
365  $Z_{\text{peak}}=4.09$ ,  $\text{size}=1320 \text{ mm}^3$ ; Figure 6A). We did not find any significant effect of retrieval suppression on  
366 hippocampal activity amplitude in the whole-brain or the ROI analysis (left hippocampus:  $t=-1.14$ ,  $df=26$ ,  
367  $p=0.26$ ; right hippocampus:  $t=-0.81$ ,  $df=26$ ,  $p=0.43$ ).

368 To characterise dynamical activity changes in the left LPFC, we extracted beta values from the cluster for  
369 each modulation run and found a decrease of the amplitude of retrieval suppression from the first run to  
370 the fourth run during the retrieval of *SUPPRESSION ASSOCIATIONS* ( $F [3, 25]=2.98$ ,  $p=0.036$ ,  $\eta^2$   
371  $=0.107$ ). However, we found an unexpected activation increase from the fourth to the fifth run, and if we  
372 combined data from all five runs, the effect is not significant anymore ( $F [4, 25]=2.03$ ,  $p=0.09$ ,  $\eta^2 =0.075$ ;  
373 Figure 6B)

374 *Intact neural representations of after memory suppression*

375 Although we did not find evidence for an effect of retrieval suppression on VVC or hippocampal activity  
376 amplitude, we still examined if retrieval suppression modulated activity patterns in the VVC or  
377 hippocampus. Pattern variability analysis revealed no significant difference between *SUPPRESSION*  
378 *ASSOCIATIONS* and *CONTROL ASSOCIATIONS* in all regions investigated (VVC:  $t=-1.035$ ,  $df=26$ ,  
379  $p=0.31$ ; Figure 6C; left hippocampus:  $t=-0.75$ ,  $df=26$ ,  $p=0.43$  ; Figure 6D; right hippocampus:  $t=-.010$ ,  
380  $df=26$ ,  $p=0.92$  ; Figure 6E)

381

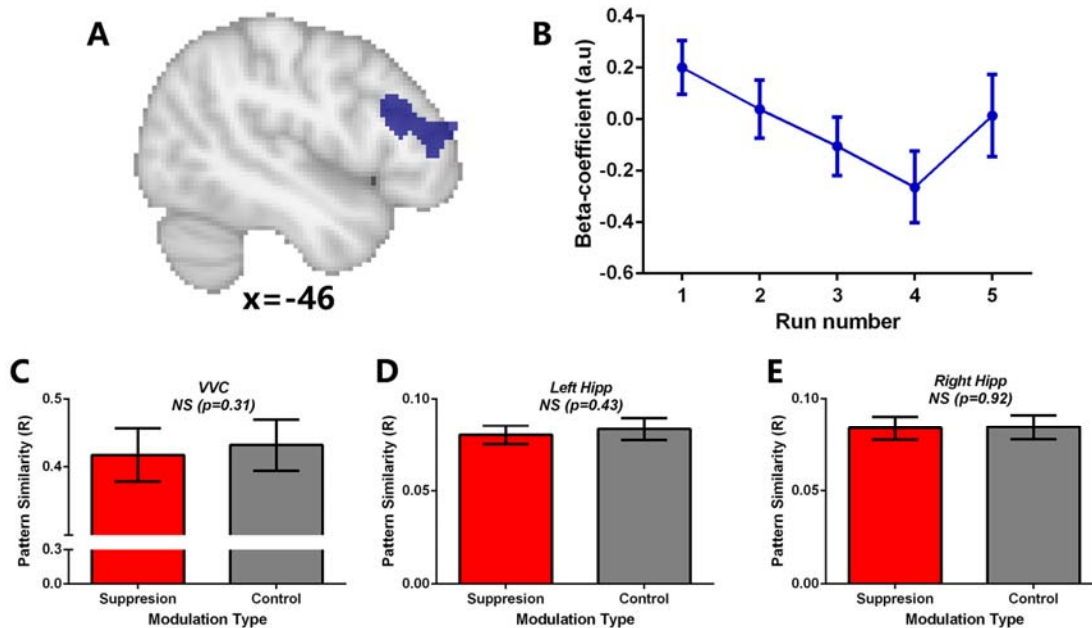

382

383 **Figure 6 Repeated suppression disengaged lateral prefrontal cortex (LPFC) during subsequent memory retrieval.** (A)  
384 During the final memory test, we found lower activity amplitude in the left LPFC for *SUPPRESSION ASSOCIATIONS* compared  
385 to *CONTROL ASSOCIATIONS*. (B) During the modulation, the activity amplitude of the same LPFC cluster tended to decreased  
386 over repetitions (from run1 to run4,  $p=0.03$ , from run1 to run5,  $p=0.09$ ). (C) No differences in VVC's activity pattern variability  
387 between *SUPPRESSION ASSOCIATIONS* and *CONTROL ASSOCIATIONS* ( $p=0.31$ ) during the final test. (D) No differences in  
388 left hippocampal activity pattern variability between retrieval *SUPPRESSION ASSOCIATIONS* and *CONTROL ASSOCIATIONS*  
389 ( $p=0.43$ ) during the final test. (E) No differences in right hippocampal activity pattern variability between *SUPPRESSION*  
390 *ASSOCIATIONS* and *CONTROL ASSOCIATIONS* ( $p=0.92$ ) during the final test.

391

### 392 3. DISCUSSION

393 Memories are not stored as stable engrams, but flexible representations that can be modified throughout  
394 their existence. Behaviorally, our results demonstrate that, after an initial delay of 24 hours, repeated  
395 retrieval strengthened memories further, indexed by higher recall confidence and shorter reaction times. In  
396 turn, successful memory suppression during modulation was subsequently associated with lower memory  
397 performance. Neurally, we show that retrieving strengthened memories is associated with reduced activity  
398 amplitudes, but enhanced distinctiveness of pattern reactivations in the ventral visual cortex, while  
399 retrieving suppressed memories is associated with reduced activation in the left lateral prefrontal cortex.

400 First, our behavioral results revealed that associative memories could still be strengthened or suppressed  
401 by repeated retrieval or suppression separately after initial consolidation. The beneficial effect of retrieval  
402 practice on the subsequent retrieval is well established (Karpicke and Blunt, 2011; Karpicke and Roediger,  
403 2008; Karpicke and Roediger III, 2007; Smith et al., 2016). In this study, memory accuracy was already  
404 near to ceiling level after consolidation, and thus we did not find higher recall accuracy of *RETRIEVAL*  
405 *ASSOCIATIONS* compared to *CONTROL ASSOCIATIONS*. But we observed higher memory confidence  
406 and shorter reaction times during memory retrieval, suggesting strengthened associative memories after  
407 this modulation. Corroborating the behavioral effect for the final memory test, we also found that repeat  
408 retrieval of certain memories increased their tendency to remain stable in mind during the modulation  
409 phase. In contrast, we only found a modest effect of retrieval suppression. There are at least two possible  
410 reasons for this: first, due to extensive training during encoding and/or the nature of our picture-location  
411 associations, recall accuracy for all conditions was close to ceiling level. This made suppression of  
412 associations difficult. Second, the suppression-induced forgetting effect is smaller when memories have  
413 been consolidated (Liu et al., 2016). Thus, in line with previous studies, suppression-induced forgetting  
414 may have not emerged at the group level (Gagnepain et al., 2017; Liu et al., 2016). Critically, we  
415 replicated two findings in the memory suppression literature to confirm that our memory suppression  
416 modulation was still effective. First, when unwanted memories were suppressed repeatedly, their tendency  
417 to intrude was reduced (Benoit et al., 2015; Gagnepain et al., 2017; Hellerstedt et al., 2016; B. J. Levy and  
418 Anderson, 2012; van Schie and Anderson, 2017). Second, the extent of this reduction correlated with  
419 subsequent suppression-induced forgetting effects across participants (B. J. Levy and Anderson, 2012).

420 For *RETRIEVAL ASSOCIATIONS*, fMRI revealed a dynamic process based on decreased retrieval-related  
421 activity amplitude and enhanced distinctiveness of activity patterns. Recently, Antony and colleagues  
422 proposed that retrieval acts as a fast route to memory consolidation (Antony et al., 2017), and provided  
423 initial evidence for the rapid creation of neocortical memory traces during retrieval practice (Ferreira et al.,  
424 2019). Similar to their results, we also found that hippocampal activity decreased across repeated retrieval,

425 even though our modulation targeted already consolidated associative memories. These results are  
426 consistent with decreasing retrieval-related hippocampal activity over consolidation (Takashima et al.,  
427 2009, 2006). Extending these hippocampal findings, we revealed that repeated retrieval-induced neural  
428 dynamics was associated with both reduced activity amplitude and increased activity pattern  
429 distinctiveness in relevant perceptual regions. This pattern of results is in line with our knowledge about  
430 how expectations shape brain responses. Expected stimuli reduce overall activity amplitude, a  
431 phenomenon termed “expectation suppression”(Summerfield et al., 2008; Summerfield and De Lange,  
432 2014). Underlying neural representations become more distinct over the course of repetition (de Lange et  
433 al., 2018; Kok et al., 2012). Our findings suggest that this principle holds for modulation of memory  
434 representation and not only for visual expectation. During retrieval of strengthened memories, redundant  
435 neural activity is suppressed and only the fine-grained neural patterns remain that enable more distinctive  
436 memory representations with higher fidelity. This explanation is further supported by the correlation  
437 between changes in activity amplitude and distinctiveness of activity patterns across participants when we  
438 restricted our analyses to the same cluster of visual processing voxels. One may argue that the observed  
439 neural changes may just be associated with repeated visual processing of memory cues, but not  
440 specifically with repeated retrieval. Our fMRI results from the modulation phase challenge this argument.  
441 We did not only find reduced activity amplitude and more distinct activity patterns during the final  
442 memory test, but also demonstrated that these neural changes gradually emerged across repeated retrieval  
443 during the modulation phase. A similar effect was not found during repeated suppression, even though  
444 memory cues were also presented repeatedly. Therefore, the observed neural changes cannot be simply  
445 explained by repeated processing of memory cues at the perceptual level, and thus they are more likely to  
446 be the result of repeated retrieval.

447 For *SUPPRESSION ASSOCIATIONS*, we observed lower LPFC activity amplitude, but relatively intact  
448 activity patterns in visual and mnemonic areas during subsequent retrieval. Active memory suppression  
449 during retrieval is proposed to be partially supported by inhibitory control mechanisms mediated by the

450 lateral prefrontal cortex (Anderson and Hanslmayr, 2014; Guo et al., 2018). During retrieval suppression,  
451 LPFC is typically activated (Anderson et al., 2004; Guo et al., 2018; B. J. Levy and Anderson, 2012), but  
452 it showed gradually decreasing activity amplitude from the early suppression attempts to the later trials of  
453 suppression (Depue et al., 2007). Consistent with this pattern of temporal change, we found a similar  
454 decrease in LPFC activity amplitude across suppression attempts during the modulation phase and lower  
455 activity amplitude during the subsequent retrieval (i.e., final memory test). Together with the trial-by-trial  
456 intrusion frequency rating during modulation, this activity decrease across suppression attempts may  
457 suggest less inhibitory control demands when suppressing increasingly weakened memory traces. The  
458 observed reduction in LPFC activity during the subsequent retrieval might be a long-lasting effect of the  
459 progressively reduced activity amplitude after repeated memory suppression. The lower LPFC activity  
460 during the final memory test might be a long-lasting effect of the progressively reduced activity amplitude  
461 after repeated memory suppression. Another interesting observation related to memory suppression is that  
462 we found weak evidence for suppression-induced changes in activity pattern variability of both perceptual  
463 and mnemonic areas during the final memory test. Even though the brain regions, in particular for LPFC-  
464 hippocampal top-down modulation circuit, involved in memory suppression have been examined  
465 (Anderson and Hanslmayr, 2014; Guo et al., 2018), the changes in neural representations of individual  
466 memory trace underlying the suppression-induced forgetting effect remained understudied. One possibility  
467 is that, similar to competition-induced forgetting, the cortical neural representation of individual memory  
468 is suppressed, leading to forgetting (Wimber et al., 2015). Another complementary explanation is that  
469 although underlying neural representations remain intact, memory retrieval operation is impaired, causing  
470 difficulties when recalling stored information. Our results provide support for the latter explanation by  
471 showing diminished LPFC activation when retrieving previously suppressed memories. LPFC not only  
472 plays a critical role in inhibitory control over retrieval suppression (Anderson et al., 2016) but also  
473 supports cognitive control processes needed to retrieve episodic memories (Badre and Wagner, 2007;  
474 Spaniol et al., 2009). The observed reduction in LPFC activity during the final memory test might suggest  
475 insufficient cognitive control resources to facilitate retrieval. It is noteworthy that our pattern analysis was

476 restricted to remembered associations after the memory suppression modulation. Future studies with  
477 stronger suppression-induced forgetting effect can directly compare the activity pattern variability  
478 between still-remembered associations and forgotten associations.

479 Taken together, our results provide behavioral and neural evidence for dynamically adapting  
480 representations of episodic memories separately modulated by repeated retrieval and suppression. We  
481 found that repeated retrieval reduced activity amplitude, but increased the distinctiveness of activation  
482 patterns in visual areas. We propose that lower overall activity amplitude, but higher distinctiveness of  
483 cortical reinstatement is evidence for more distinct neural representations of associative memories  
484 strengthened by repeated retrieval. In contrast, for resilient memories, repeated memory suppression  
485 dynamically reduced lateral prefrontal activity without altering the distinctiveness of pattern reactivations.

486

487

488

489

490

491

492

493

494

495

496

497

## 498 **4. Materials and Methods**

### 499 4.1 Participants

500 Thirty-two right-handed, healthy young participants aged 18-35 years were recruited from the Radboud  
501 Research Participation System. They all had corrected-to-normal or normal vision and reported no history  
502 of psychiatric or neurological disease. All of them are native Dutch speakers. Two participants were  
503 excluded from further analyses due to memory performance lower than the chance level, three participants  
504 were excluded from all of the analyses because of excessive head motion during scanning, and  
505 Neuroimaging data of one participant was partly used: he/she was excluded from the analysis of the  
506 modulation phase (Think/No-Think paradigm) due to the head motion only during this task, while his/her  
507 data during other tasks were included in the analyses. Finally, 27 participants (16 females, age=19-30,  
508 mean=23.41, SD=3.30) were included in the analyses of the final test phase, and 26 participants (15  
509 females, age=19-30, mean=23.51, SD=3.30) were included in the analyses of modulation phase. We used  
510 Dutch-version of Beck Depression Inventory (BDI) (Roelofs et al., 2013) and State-Trait Anxiety  
511 Inventory (STAI) (van der Bij et al., 2003) to measure the participants' depression and anxiety level. All  
512 of our participants scored normally in BDI and STAI. Furthermore, because of the two-session design (24  
513 hours' interval) of the study, we used the Pittsburgh sleep quality index (PSQI) (Buysse et al., 1989) to  
514 measure the sleep quality between two scanning sessions. No participants reported abnormal sleep-related  
515 behaviors or significantly less than normal sleep time. The experiment was approved by, and conducted in  
516 accordance with requirements of, the local ethics committee (Commissie Mensgebonden Onderzoek  
517 region Arnhem-Nijmegen, The Netherlands) and the declaration of Helsinki, including the requirement of  
518 written informed consent from each participant before the beginning of the experiment.

### 519 4.2 Materials

#### 520 *Locations and maps*



521 We used 48 distinctive locations (e.g. buildings, bridges) drawn from two cartoon maps as the memory  
522 cues in our study. The maps are not corresponding to the layout of any real city in the world and  
523 participants have never been exposed to the maps before the experiment.

#### 524 *Pictures*

525 48 pictures (24 neutral and 24 negative pictures) from the International Affective Picture System (IAPS)  
526 (Lang et al., 1997) were used in this study, and these pictures can be categorized as one of four following  
527 groups: animal (e.g. cat), human (e.g. reading girl), object (e.g. clock) or location (e.g. train station).  
528 Category information was used for the following memory-based category judgment test. We did not report  
529 the valence-related results in this study. All images were converted to the same size and resolution for the  
530 experiment with their original colors.

#### 531 *Picture-location associations*

532 Each picture was paired with one of the 48 locations to form the picture-location association. We (W.L.  
533 and J.V) carefully screened all the associations to prevent the explicit semantic relationship between  
534 picture and location (e.g. lighter- fire department). All 48 picture-location association were divided into  
535 three groups for different types of modulation (See Modulation Phase).

### 536 4.3 Experiment design

#### 537 *Overview of the design*

538 This study is a two-session fMRI experiment, with the 24 hours interval between two sessions (Figure  
539 1A). Day1 session consists of the familiarization phase (Figure 1B), study phase (Figure 1C), and  
540 immediate typing test. Day2 session consists of the second typing test, modulation phase (Figure 1D), and  
541 final memory test (Figure 1E). Among these phases, the familiarization, modulation, and final memory  
542 test phase was performed in the scanner, while study phase and two typing tests were performed in the  
543 behavioral lab.

544 *Familiarization phase*

545 The first task in the scanner for our participants was the familiarization phase. This phase was  
546 conducted to obtain the picture-specific brain responses to all of the 48 pictures, measured by the Blood-  
547 Oxygen-Level Dependent (BOLD) activity patterns. The second purpose of the task is to let participants  
548 become familiar with the pictures to be associated with locations later. There are in total four functional  
549 runs of the familiarization. For each run, each picture was shown once for 3s. The order of the  
550 presentation was pseudorandom and pre-generated by self-programmed Python code. The dependence  
551 between the orders of different runs was minimized to prevent potential sequence-based memory encoding.  
552 To keep participants focused during the task, we instructed them to categorize the presented picture via the  
553 multiple-choice question with four options (animal, human, object, and location). We used an exponential  
554 inter-trial intervals (ITI) model (mean=2s, minimum=1s, maximum=4s) to generate the ITIs between trials.  
555 Participants' responses were recorded by an MRI-compatible response box.

556 *Study phase*

557 Each picture-location association was presented twice in two separate runs. During each study trial,  
558 the entire map was first presented for 2.5s, then one of the 48 locations was highlighted with a BLUE  
559 frame, for 3s, and finally, the picture and its associated location were presented for 6s. Participants were  
560 encouraged to use both the relative position of the memory cues on the maps and the appearance of the  
561 highlighted areas to facilitate association learning. We pre-generated a pseudorandom order of the trials to  
562 minimize the similarity between the order used in familiarization and the order used in the study phase.

563 *Typing test phase*

564 Immediately after the study phase, participants performed a typing test (day1) assessing picture-  
565 location association learning. Each location was presented again (4s) in an order which differs from the  
566 study phase, and participants had maximally 60s to type on the standard keyboard to describe the  
567 associated picture. Twenty-four hours later (day2), participants performed the typing test again at the same

568 behavioral lab. The procedure is identical to the immediate typing test, but with a different order of the  
569 trials.

### 570 *Modulation phase*

571 The modulation phase is the first task participants performed on the day2 MRI session. We used the  
572 think/no-think (TNT) paradigm with the trial-by-trial self-report measures to modulate established  
573 associative memories. The same paradigm has been used in previous neuroimaging studies, and the self-  
574 report does not affect the underlying memory control process (Anderson et al., 2004; B. J. Levy and  
575 Anderson, 2012). Forty-eight picture-location associations were divided into three conditions. One-third  
576 of the associations (16 associations) were assigned to retrieval (“Think”) condition, one-third of the  
577 associations were assigned to suppression (“No-Think”) condition, and the remaining one-third of the  
578 associations were assigned to control condition. The assignment process was counterbalanced between  
579 participants. Therefore, at the group level, for each picture-location association, the possibility of  
580 belonging to one of the three conditions of modulation is around 33%. Associations that belong to  
581 different conditions underwent different types of modulation during this phase. Locations which belong to  
582 the control condition were not presented during this phase. For retrieval trials, locations were highlighted  
583 with the GREEN frame for 3s, and participants were instructed to recall the associated picture quickly and  
584 actively and to keep it in mind until the map disappeared from the screen. For the suppression trials,  
585 locations were highlighted with the RED frame for 3s, and our instruction for participants is to prevent the  
586 potential memory retrieval and try to keep an empty mind. We also told the participants that they should  
587 not close their eyes or pay attention to other things outside the screen during the presentation of memory  
588 cues. After each retrieval or suppression trial, participants have maximum 3s to report their experience  
589 during the cue presentation. Specifically, they answered a multiple-choice question with four options  
590 (*Never, Sometimes, Often, and Always*) by pressing the button on the response box to indicate whether the  
591 associated picture entered their mind during that particular trial.

592 The modulation phase consisted of in total of five functional runs (64 trials per run). In each run, 32  
593 locations (half retrieval trials, and half suppression trials) were presented twice. Therefore, for each  
594 memory cue that not belongs to the control condition, it was presented ten times during the entire  
595 modulation phase. Again, we pre-generated the orders of the presentation to prevent the similar order  
596 sequences across five modulation runs. Between each trial, fixation was presented for 1-4s (mean=2s,  
597 exponential model) as the ITI.

#### 598 *Final test phase*

599 After the modulation phase, participants performed the final memory test within the scanner. All 48  
600 locations (including both the retrieval/suppression associations as well as control associations) were  
601 presented again by highlighting a certain part of the map with a BLUE frame. During the presentation (4s),  
602 participants were instructed to recall the associated picture as vividly as possible and keep the mental  
603 image in their mind. Critically, visual inputs during this phase were highly similar across trials and  
604 participants because the entire maps were always presented, just with different locations highlighted. Next,  
605 participants were asked to give the responses on two multiple-choice questions within 7s (3.5s for each  
606 question): (1) “how confident are you about the retrieval?” They responded with one of the four following  
607 options: Cannot recall, low confident, middle confident and high confident. (2) “Please indicate the  
608 category of the picture you were recalling?” They also had four options to choose from (Animal, Human,  
609 Object, and Location).

#### 610 4.4 Behavioral data analysis

##### 611 *Familiarization phase*

612 In this study, we did not focus on the accuracy of the category judgement because categorization could  
613 be a subjective process. We mainly used the responses from participants to control for the effect of  
614 subjective category categorization on the following memory performance evaluation. Specifically, for a  
615 picture, if the participant consistently labels it across four repetitions as a different category compared to

616 our predefined labels, we will generate an individual-specific category label for that participant and then  
617 use his/her own category label for this picture to evaluate their responses on the final test.

### 618 *Typing test*

619 Participants' answers were evaluated by two native Dutch experimenters (S.M and J.V). The general  
620 principle is that if the answer contains enough specific information (e.g. a little black cat), to allow the  
621 experimenter to identify the picture from the 48 pictures used, it will be labelled as a correct answer. On  
622 the contrast, if the answer is not specific enough (e.g. a small animal), then it will be labelled as an  
623 incorrect answer. Two independent assessors evaluated answers from the two typing test phase. We used  
624 Cohen's kappa coefficient ( $\kappa$ ) to measure intra-rater reliability of their evaluations. In general,  $\kappa$  larger than  
625 0.81 suggests almost perfect rater reliability. After the immediate typing test, we only invited participants  
626 with at least 50% accuracy to the day2 experiment. For the typing test 24 hours later, participants'  
627 responses were evaluated by the same experimenter again. We do not have accuracy requirement for day2  
628 typing test, all of the participants (if they meet other quality control criteria) were analysed regardless of  
629 the accuracies. Based on the participants' responses on the typing testing 24 hours later, for each  
630 participant, we identified picture-location associations that he/she did not learn or already forgot. These  
631 associations were not considered in the following behavioral and neuroimaging analyses because  
632 participants have no memory associations to modulate. We calculated the average accuracies for the  
633 immediate typing test and typing test 24 hours later and investigated the delay-related decline of memory  
634 performance using the paired t-test.

### 635 *Modulation phase*

636 Responses during the modulation phase were analyzed separately for retrieval trials and suppression  
637 trials. We first calculated the percentage of each option (never, sometimes, often, and always) chosen  
638 across 160 retrieval trials and 160 suppression trials for each participant without considering ten  
639 repetitions. Next, we quantified the dynamic changes in task performance across repetitions (runs). Before

640 the following analyses, we coded the original categorical variable using numbers (Never-1; Sometimes-2;  
641 Often-3; Always-4). For all the established picture-location associations, we calculated their average  
642 retrieval frequency rating (based on retrieval trials) and intrusion frequency rating (based on suppression  
643 trials) on each repetition. We assumed that retrieval frequency rating indicates the retrieval quality of the  
644 memory retrieval (the higher the rating, stronger and more vivid the retrieved pictures) and intrusion  
645 frequency rating reflects the success of memory control (lower the rating, more successful the suppression  
646 is). We used a repeated-measures ANOVA to model the change of retrieval and intrusion rating across  
647 repetitions to test if the repeated attempt to retrieval or suppress a memory trace could strength or weaken  
648 the associations. Additionally, to quantify individual differences in memory control efficiency (B. J. Levy  
649 and Anderson, 2012), we calculated the *intrusion slope score* for each participant. Using all the intrusion  
650 rating of suppression trials, we used the linear regression to calculate the slope of intrusion rating across  
651 ten repetitions during the modulation phase for each participant. The increasingly negative slope score  
652 reflects better memory control at preventing associated pictures come into awareness.

### 653 *Final test phase*

654 For each trial of the final test, we calculated both the subjective memory measure based on the  
655 confidence rating (1,2,3,4) and objective memory measure based on the memory-based category judgment  
656 (correct/incorrect). Also, we extracted the reaction times (RT) of the memory-based category judgments to  
657 represent the speed of memory retrieval. Subjective memory measure, objective memory measure, and  
658 retrieval speed were averaged across trials within each condition of modulation (retrieval, suppression,  
659 and control) for each participant. To investigate the effect of types of modulation on the subjective,  
660 objective memory, and retrieval speed, we performed a repeated-measure ANOVA to detect within-  
661 participants' differences between *RETRIEVAL ASSOCIATIONS*, *SUPPRESSION ASSOCIATIONS*, and  
662 *CONTROL ASSOCIATIONS*. To assess individual differences in suppression-induced forgetting, we  
663 calculated the *suppression score* by subtracting the objective memory measure of retrieval suppression

664 associations (“no-think” items) from control association. Participants showed more forgetting as the result  
665 of suppression had more negative suppression scores.

#### 666 *Combinatory analysis of modulation and final test phase*

667 To replicate the relationship between the memory control efficiency during the TNT task and  
668 suppression-induced forgetting effect during later retrieval reported before (B. J. Levy and Anderson,  
669 2012), we correlated suppression scores with intrusion slope scores across all the participants. Notably,  
670 sample size (N=27) of this cross-participant correlational analysis is modest. But it is just a secondary  
671 analysis for the replication attempt.

#### 672 4.5 fMRI data acquisition and pre-processing

##### 673 *Acquisition*

674 MRI data were acquired using a 3.0 T Siemens PrismaFit scanner (Siemens Medical, Erlangen,  
675 Germany) and a 32 channel head coil system at the Donders Institute, Centre for Cognitive Neuroimaging  
676 in Nijmegen, the Netherlands. For each participant, MRI data were acquired on two MRI sessions (around  
677 1 hour for each session) with 24 hours’ interval. We used three types of sequences in this study: (1) a 3D  
678 magnetization-prepared rapid gradient echo (MPRAGE) anatomical T1-weighted sequence with the  
679 following parameters: 1 mm isotropic, TE = 3.03 ms, TR = 2300 ms, flip angle = 8 deg, FOV = 256 × 256  
680 × 256 mm; (2) Echo-planar imaging (EPI)-based multi-band sequence (acceleration factor=4) with the  
681 following parameters: 68 slices (multi-slice mode, interleaved), voxel size 2 mm isotropic, TR = 1500 ms,  
682 TE = 39 ms, flip angle =75 deg, FOV = 210 × 210 × 210 mm; (3) magnitude and phase images were  
683 collected to correct for distortions (voxel size of 2 × 2 × 2 mm, TR = 1,020 ms, TE = 12 ms, flip angle =  
684 90 deg).

685 During the day1 session, anatomical T1 image was acquired firstly, followed by the field map  
686 sequence. Before the four EPI-based pattern localization runs, 8 minutes resting-state data was acquired  
687 from each participant using the same sequence parameters. We did not present any results based on the

688 collected resting-state data in this study. Day2 session began with field map sequence. Then six EPI-based  
689 task-fMRI runs (five runs of the modulation phase and one run of the final test phase) were acquired using  
690 the same sequence.

#### 691 *Preprocessing of neuroimaging data*

692 All functional runs underwent the same preprocessing steps using FEAT (FMRI Expert Analysis Tool)  
693 Version 6.00, part of FSL (FMRIB's Software Library, [www.fmrib.ox.ac.uk/fsl](http://www.fmrib.ox.ac.uk/fsl))(Jenkinson et al., 2012). In  
694 general, the pipeline was based on procedures suggested by Mumford and colleagues  
695 (<http://mumfordbrainstats.tumblr.com>) and the article that introduced the ICA-based strategy for  
696 Automatic Removal of Motion Artifacts (ICA-AROMA) (Pruim et al., 2015). The first 4 volumes of each  
697 run were removed from the 4D sequences for the stabilization of the scanner. The following pre-statistics  
698 processing was applied; motion correction using MCFLIRT (Jenkinson et al., 2002); field  
699 inhomogeneities were corrected using B0 Unwarping in FEAT; non-brain removal using BET (Smith,  
700 2002); grand-mean intensity normalization of the entire 4D dataset by a single multiplicative factor. We  
701 used different spatial smoothing strategies based on the type of analysis the data will be used for. For data  
702 to be used in univariate analyses, we applied a 6mm kernel. However, for data to be used in multivariate  
703 pattern analyses, no spatial smoothing was performed to largely keep the voxel-wise pattern information.  
704 In addition to the default FSL motion correction algorithm, we used ICA-AROMA to further remove the  
705 motion-related spurious noise, and chose the results from the “non-aggressive denoising” algorithm for the  
706 following analyses. Prior to time-series statistical analyses, highpass temporal filtering (Gaussian-  
707 weighted least-squares straight line fitting with  $\sigma=50.0s$ ) was applied.

708 Registration between all functional data, high-resolution structural data, and standard space was  
709 performed using the following steps. Firstly, we used the Boundary Based Registration (BBR) (Greve and  
710 Fischl, 2009) to register functional data to the participant's own high-resolution structural image. Next,  
711 registration of high resolution structural to standard space was carried out using FLIRT (Jenkinson et al.,  
712 2002; Jenkinson and Smith, 2001) and was then further refined using FNIRT nonlinear registration



713 (Andersson et al., 2007). Resulting parameters were used to align maps between naïve-space and standard  
714 space and back-projected region-of-interests into naïve space.

#### 715 4.6 Anatomical Region-of-Interest (ROI) in fMRI analyses

716 Based on previous neural reactivation studies which also used visual stimulus (Lee et al., 2018; Polyn  
717 et al., 2005; Wimber et al., 2015), we hypothesized that ventral visual cortex (VVC) and hippocampus  
718 might carry picture-specific and category-specific information of the memory contents. Therefore, we  
719 chose VVC and the hippocampus as the ROIs in our fMRI analyses. All ROIs were first defined in the  
720 common space and back-projected into the participant's naïve space when necessary using parameters  
721 obtained from FSL during registration.

722 We defined anatomical VVC ROI based on the Automated Anatomical Labeling (AAL) human atlas  
723 which is implemented in the WFU pickatlas software (<http://fmri.wfubmc.edu/software/PickAtlas>). The  
724 procedure was used before in a previous neural reactivation study conducted by Wimber and colleagues  
725 (Wimber et al., 2015). Brain regions including bilateral inferior occipital lobe, parahippocampal gyrus,  
726 fusiform gyrus, and lingual gyrus were extracted from the AAL atlas and combined to the VVC mask. The  
727 VVC mask was mainly used as the boundary to locate visual-related voxels in the following neural pattern  
728 analyses.

729 The hippocampal ROI was defined using a bilateral hippocampus mask within the AAL provided by  
730 WFU pickatlas software. To yield better coverage of participants' anatomies, the original mask was  
731 dilated by a factor of 2 in the software. Admittedly, the generation of the hippocampus via the AAL atlas  
732 is less precise compared to the subject-specific hippocampus segmentation algorithm such as FSL's  
733 automatic subcortical segmentation protocol (FIRST) (Khan et al., 2008). The reason why we still use the  
734 AAL atlas is that our following analyses included both within-participant and cross-participant analyses.  
735 The hippocampal ROIs were mainly used for hypothesis-driven fMRI data analyses if the whole-brain  
736 analyses and correction do not reveal cluster(s) within the hippocampus.

737 4.7 Univariate Generalized Linear Model (GLM) analyses of response amplitude

738 *GLM analyses of neuroimaging data from the final test phase*

739 To investigate how different modulations (retrieval/suppression) modulate the subsequent univariate  
740 activation, we ran the voxel-wise GLM analyses of the final test run. All time-series statistical analysis  
741 was carried out using FILM with local autocorrelation correction (Woolrich et al., 2001) using FEAT. In  
742 total, six regressors were included in the model. We modelled the presentation of memory cues (locations)  
743 as three kinds of regressors (duration=4s) based on their modulation history (retrieval, suppression, or  
744 control). To account for the effect of unsuccessful memory retrieval, we separately modelled the location-  
745 picture associations which they cannot recall as a separate regressor. Lastly, the button press was modelled  
746 as two independent regressors (confidence and category judgment). All the trails were convolved default  
747 hemodynamic response function (HRF) within the FSL.

748 We conducted two planned contrasts (retrieval vs control and suppression vs control) first at the  
749 subject space and then aligned resulting statistical maps to MNI space using the parameters from the  
750 registration. These aligned maps were used for the group-level analyses and corrected for multiple  
751 comparisons using default cluster-level correction within FEAT (voxelwise  $Z > 3.1$ , cluster-level  $p < .05$   
752 FWER corrected). All of the contrasts were first conducted at the whole-brain level. Then, given the role  
753 of the hippocampus in the task, we further extracted beta values from the hippocampal ROIs and  
754 compared them for the same contrasts (retrieval vs control and suppression vs control).

755 *GLM analyses of neuroimaging data from the modulation phase*

756 We ran the voxel-wise GLM analyses for each modulation run separately. In total, three regressors  
757 were included in the model. We modelled the presentation of the memory cues (location) as two kinds of  
758 regressors (duration=3s) according to their modulation instruction (retrieval or suppression). Button press  
759 was modelled as one independent regressor. In addition, if applicable, location-picture associations that  
760 our participants could not recall were modelled as a regressor. Based on contrast-defined ROI (e.g.

761 retrieval vs control, threshold  $Z > 2.3$ ), or anatomical-defined ROI (e.g. hippocampus), we extracted beta  
762 values of these ROIs from whole-brain maps of each modulation run separately. We investigated  
763 repetition-related changes in beta values using the Repeated ANOVA for retrieval and suppression  
764 condition separately. No multiple comparison correction was used to control for the number of ROIs  
765 involved, and we reported raw p-values for each ROI analysis.

#### 766 4.8 Multivariate pattern analyses of brain activation patterns

##### 767 *Activation Pattern estimation*

768 All preprocessed (unsmoothed) familiarization, modulation, and final test functional runs were  
769 modelled in separate GLMs in each participant's naïve space. For each trial within familiarization, we  
770 generated a separate regressor using the onset of picture presentation and 3s as the duration. At the same  
771 time, we generated one regressor for different button presses of the category judgment to control for the  
772 motor-related brain activity. In total, 49 regressors were included in the model. This procedure led to a  
773 separate statistical map (t-values) for each trial. Similarly, for each modulation and final test run, we  
774 generated a separate regressor using the onset of the presentation of location (memory cue) and 3s as the  
775 duration. However, button presses were not included in the model because they may potentially carry  
776 ongoing memory-related information. Similarly, we got a separate t map for each modulation or test trial.

##### 777 *ROI-based trial-by-trial pattern variability analysis on the modulation and final test data*

778 Representation similarity analysis (RSA) (Cohen et al., 2017) was used to calculate trial-by-trial  
779 pattern variability within particular types of test trials (e.g. recall of associations belongs to the  
780 *RETRIEVAL ASSOCIATIONS*). Because of the nature of the within-participant analysis here, to improve  
781 the pattern variability estimation, all the calculations were based on activation patterns on the native space.

782 Firstly, we analyzed the multivariate activation patterns on the final test. The identified VVC voxels  
783 were transformed from the standard space to native space and then used as the mask to extract single-trial  
784 activation patterns to vectors and z-scored. We excluded all the trials with the incorrect memory-based

785 category judgement, then divided remaining trials into three conditions based on their modulation history  
786 (e.g. retrieval practice or retrieval suppression). Next, for activation patterns of trials within the same  
787 condition, we calculated neural pattern variability using Pearson correlations between all possible pairs of  
788 trials within the group. The calculations led to three separate correlation matrices for three types of test  
789 trials for each participant. Finally, we used the mean value of all of the r values located at the left-triangle  
790 to represent the neural pattern variability of the condition (higher the r-value, lower the pattern variability).  
791 All the mean r values were Fisher-r-to-z transformed before the following statistical analyses. To  
792 investigate if different modulations have different effects on memory representation during the final test,  
793 we performed two planned within-participant comparisons: [1] *RETRIEVAL ASSOCIATIONS* vs  
794 *CONTROL ASSOCIATIONS*; [2] *SUPPRESSION ASSOCIATIONS* vs *CONTROL ASSOCIATIONS*

795 Next, we used the same approach to analyze the modulation data, in order to track the dynamic change  
796 of memory representation. For each presented location, activity patterns were extracted using the same  
797 mask from five modulation runs. Similarly, within-condition (retrieval or suppression) trial-by-trial pattern  
798 variability was calculated for each condition and each run. The dynamic change was modelled using the  
799 condition by run interaction using the ANOVA analysis.

#### 800 4.9 Data and code availability.

801 Custom code used and datasets generated and/or analysed during the current study are available from  
802 the corresponding author upon request or via the Open Science Framework (OSF)( <https://osf.io/ucty2/>).

803

804

805

806

807

## 808 **References**

- 809
- 810 Anderson MC, Bunce JG, Barbas H. 2016. Prefrontal--hippocampal pathways underlying inhibitory  
811 control over memory. *Neurobiol Learn Mem* **134**:145–161.
- 812 Anderson MC, Green C. 2001. Suppressing unwanted memories by executive control. *Nature* **410**:366–  
813 369. doi:10.1038/35066572
- 814 Anderson MC, Hanslmayr S. 2014. Neural mechanisms of motivated forgetting. *Trends Cogn Sci* **18**:279–  
815 292.
- 816 Anderson MC, Ochsner KN, Kuhl B, Cooper J, Robertson E, Gabrieli SW, Glover GH, Gabrieli JDE.  
817 2004. Neural systems underlying the suppression of unwanted memories. *Science (80- )* **303**:232–  
818 235.
- 819 Andersson JLR, Jenkinson M, Smith S, others. 2007. Non-linear registration aka Spatial normalisation  
820 FMRIB Technial Report TR07JA2. *FMRIB Anal Gr Univ Oxford*.
- 821 Antony JW, Ferreira CS, Norman KA, Wimber M. 2017. Retrieval as a fast route to memory  
822 consolidation. *Trends Cogn Sci* **21**:573–576.
- 823 Badre D, Wagner AD. 2007. Left ventrolateral prefrontal cortex and the cognitive control of memory.  
824 *Neuropsychologia* **45**:2883–2901.
- 825 Benoit RG, Hulbert JC, Huddleston E, Anderson MC. 2015. Adaptive top--down suppression of  
826 hippocampal activity and the purging of intrusive memories from consciousness. *J Cogn Neurosci*  
827 **27**:96–111.
- 828 Bosch SE, Jehee JFM, Fernández G, Doeller CF. 2014. Reinstatement of associative memories in early  
829 visual cortex is signaled by the hippocampus. *J Neurosci* **34**:7493–7500.
- 830 Buysse DJ, Reynolds III CF, Monk TH, Berman SR, Kupfer DJ. 1989. The Pittsburgh Sleep Quality Index:  
831 a new instrument for psychiatric practice and research. *Psychiatry Res* **28**:193–213.
- 832 Chen J, Leong YC, Honey CJ, Yong CH, Norman KA, Hasson U. 2017. Shared memories reveal shared  
833 structure in neural activity across individuals. *Nat Neurosci* **20**:115.
- 834 Cohen JD, Daw N, Engelhardt B, Hasson U, Li K, Niv Y, Norman KA, Pillow J, Ramadge PJ, Turk-  
835 Browne NB, others. 2017. Computational approaches to fMRI analysis. *Nat Neurosci* **20**:304.
- 836 de Lange FP, Heilbron M, Kok P. 2018. How Do Expectations Shape Perception? *Trends Cogn Sci*  
837 **22**:764–779. doi:10.1016/j.tics.2018.06.002
- 838 Depue BE, Curran T, Banich MT. 2007. Prefrontal regions orchestrate suppression of emotional memories  
839 via a two-phase process. *Science (80- )* **317**:215–219.
- 840 Ebbinghaus H. 1885. Über das gedächtnis: untersuchungen zur experimentellen psychologie. Duncker &  
841 Humblot.
- 842 Ferreira CS, Charest I, Wimber M. 2019. Retrieval aids the creation of a generalised memory trace and  
843 strengthens episode-unique information. *Neuroimage*. doi:10.1016/j.neuroimage.2019.07.009
- 844 Gagnepain P, Hulbert J, Anderson MC. 2017. Parallel regulation of memory and emotion supports the  
845 suppression of intrusive memories. *J Neurosci* 2716–2732.
- 846 Greve DN, Fischl B. 2009. Accurate and robust brain image alignment using boundary-based registration.  
847 *Neuroimage* **48**:63–72.
- 848 Guo Y, Schmitz TW, Mur M, Ferreira CS, Anderson MC. 2018. A supramodal role of the basal ganglia in  
849 memory and motor inhibition: Meta-analytic evidence. *Neuropsychologia* **108**:117–134.  
850 doi:10.1016/j.neuropsychologia.2017.11.033
- 851 Hellerstedt R, Johansson M, Anderson MC. 2016. Tracking the intrusion of unwanted memories into  
852 awareness with event-related potentials. *Neuropsychologia* **89**:510–523.
- 853 Jenkinson M, Bannister P, Brady M, Smith S. 2002. Improved optimization for the robust and accurate  
854 linear registration and motion correction of brain images. *Neuroimage* **17**:825–841.
- 855 Jenkinson M, Beckmann CF, Behrens TEJ, Woolrich MW, Smith SM. 2012. Fsl. *Neuroimage* **62**:782–790.
- 856 Jenkinson M, Smith S. 2001. A global optimisation method for robust affine registration of brain images.  
857 *Med Image Anal* **5**:143–156.
- 858 Jimura K, Poldrack RA. 2012. Analyses of regional-average activation and multivoxel pattern information

- 859 tell complementary stories. *Neuropsychologia* **50**:544–552.
- 860 Karpicke JD, Blunt JR. 2011. Retrieval practice produces more learning than elaborative studying with  
861 concept mapping. *Science (80- )* **331**:772–775.
- 862 Karpicke JD, Roediger HL. 2008. The critical importance of retrieval for learning. *Science (80- )*  
863 **319**:966–968.
- 864 Karpicke JD, Roediger III HL. 2007. Repeated retrieval during learning is the key to long-term retention.  
865 *J Mem Lang* **57**:151–162.
- 866 Khan AR, Wang L, Beg MF. 2008. FreeSurfer-initiated fully-automated subcortical brain segmentation in  
867 MRI using large deformation diffeomorphic metric mapping. *Neuroimage* **41**:735–746.
- 868 Kok P, Jehee JFM, De Lange FP. 2012. Less is more: expectation sharpens representations in the primary  
869 visual cortex. *Neuron* **75**:265–270.
- 870 Kosslyn SM, Thompson WL, Alpert NM. 1997. Neural systems shared by visual imagery and visual  
871 perception: A positron emission tomography study. *Neuroimage* **6**:320–334.
- 872 Kuhl BA, Shah AT, DuBrow S, Wagner AD. 2010. Resistance to forgetting associated with hippocampus-  
873 mediated reactivation during new learning. *Nat Neurosci* **13**:501.
- 874 Lang PJ, Bradley MM, Cuthbert BN. 1997. International affective picture system (IAPS): Technical  
875 manual and affective ratings. *NIMH Cent Study Emot Atten* **1**:39–58.
- 876 Lashley KS. 1950. In search of the engram. *Physiol Mech* 454.
- 877 Lee S-H, Kravitz DJ, Baker CI. 2018. Differential Representations of Perceived and Retrieved Visual  
878 Information in Hippocampus and Cortex. *Cereb Cortex* 1–10. doi:10.1093/cercor/bhy325
- 879 Levy Benjamin J, Anderson MC. 2012. Purging of memories from conscious awareness tracked in the  
880 human brain. *J Neurosci* **32**:16785–94. doi:10.1523/JNEUROSCI.2640-12.2012
- 881 Levy B. J., Anderson MC. 2012. Purging of Memories from Conscious Awareness Tracked in the Human  
882 Brain. *J Neurosci* **32**:16785–16794. doi:10.1523/JNEUROSCI.2640-12.2012
- 883 Liu Y, Lin W, Liu C, Luo Y, Wu J, Bayley PJ, Qin S. 2016. Memory consolidation reconfigures neural  
884 pathways involved in the suppression of emotional memories. *Nat Commun* **7**:13375.
- 885 Müller GE, Pilzecker A. 1900. Experimentelle beiträge zur lehre vom gedächtniss. JA Barth.
- 886 O’Craven KM, Kanwisher N. 2000. Mental imagery of faces and places activates corresponding stimulus-  
887 specific brain regions. *J Cogn Neurosci* **12**:1013–1023.
- 888 Polyn SM, Natu VS, Cohen JD, Norman KA. 2005. Category-specific cortical activity precedes retrieval  
889 during memory search. *Science (80- )* **310**:1963–1966.
- 890 Pruim RHR, Mennes M, van Rooij D, Llera A, Buitelaar JK, Beckmann CF. 2015. ICA-AROMA: a  
891 robust ICA-based strategy for removing motion artifacts from fMRI data. *Neuroimage* **112**:267–277.
- 892 Rademaker RL, Chunharas C, Serences JT. 2019. Coexisting representations of sensory and mnemonic  
893 information in human visual cortex. *Nat Neurosci* **22**:1336–1344. doi:10.1038/s41593-019-0428-x
- 894 Roelofs J, van Breukelen G, de Graaf LE, Beck AT, Arntz A, Huibers MJH. 2013. Norms for the Beck  
895 Depression Inventory (BDI-II) in a large Dutch community sample. *J Psychopathol Behav Assess*  
896 **35**:93–98.
- 897 Shohamy D, Wagner AD. 2008. Integrating Memories in the Human Brain: Hippocampal-Midbrain  
898 Encoding of Overlapping Events. *Neuron* **60**:378–389. doi:10.1016/j.neuron.2008.09.023
- 899 Smith AM, Floerke VA, Thomas AK. 2016. Retrieval practice protects memory against acute stress.  
900 *Science (80- )* **354**:1046–1048.
- 901 Smith SM. 2002. Fast robust automated brain extraction. *Hum Brain Mapp* **17**:143–155.
- 902 Spaniol J, Davidson PSR, Kim ASN, Han H, Moscovitch M, Grady CL. 2009. Event-related fMRI studies  
903 of episodic encoding and retrieval: meta-analyses using activation likelihood estimation.  
904 *Neuropsychologia* **47**:1765–1779.
- 905 Summerfield C, De Lange FP. 2014. Expectation in perceptual decision making: neural and computational  
906 mechanisms. *Nat Rev Neurosci* **15**:745.
- 907 Summerfield C, Trittschuh EH, Monti JM, Mesulam M-M, Egnér T. 2008. Neural repetition suppression  
908 reflects fulfilled perceptual expectations. *Nat Neurosci* **11**:1004.
- 909 Takashima A, Nieuwenhuis ILC, Jensen O, Talamini LM, Rijpkema M, Fernández G. 2009. Shift from

910 hippocampal to neocortical centered retrieval network with consolidation. *J Neurosci* **29**:10087–  
911 10093.

912 Takashima A, Petersson KM, Rutters F, Tendolkar I, Jensen O, Zwartz MJ, McNoughton BL, Fernandez  
913 G. 2006. Declarative memory consolidation in humans: a prospective functional magnetic resonance  
914 imaging study. *Proc Natl Acad Sci* **103**:756–761.

915 van der Bij AK, de Weerd S, Cikot RJLM, Steegers EAP, Braspenning JCC. 2003. Validation of the dutch  
916 short form of the state scale of the Spielberger State-Trait Anxiety Inventory: considerations for  
917 usage in screening outcomes. *Public Health Genomics* **6**:84–87.

918 van Schie K, Anderson MC. 2017. Successfully controlling intrusive memories is harder when control  
919 must be sustained. *Memory* **25**:1201–1216.

920 Wheeler ME, Petersen SE, Buckner RL. 2000. Memory’s echo: vivid remembering reactivates sensory-  
921 specific cortex. *Proc Natl Acad Sci* **97**:11125–11129.

922 Wimber M, Alink A, Charest I, Kriegeskorte N, Anderson MC. 2015. Retrieval induces adaptive  
923 forgetting of competing memories via cortical pattern suppression. *Nat Neurosci* **18**:582–589.  
924 doi:10.1038/nn.3973

925 Woolrich MW, Ripley BD, Brady M, Smith SM. 2001. Temporal autocorrelation in univariate linear  
926 modeling of fMRI data. *Neuroimage* **14**:1370–1386.

927 Xue G. 2018. The neural representations underlying human episodic memory. *Trends Cogn Sci* **22**:544–  
928 561.

929  
930  
931  
932  
933  
934  
935  
936  
937  
938  
939  
940  
941  
942  
943  
944  
945  
946  
947  
948  
949  
950  
951  
952  
953  
954  
955  
956  
957  
958  
959  
960

961 **Acknowledgements**

962  
963 We thank Joyce van Arendonk, Joost Verchuren for the assistance of data acquisition and memory  
964 performance evaluation, Sjoerd Meijer for the memory performance evaluation, and Yingjie Shi for  
965 commenting on previous versions of the manuscript. This work was supported by a PhD fellowship from  
966 the Chinese Scholarship Council (201606990020) awarded to W.L.

967  
968

969 **Author contributions**

970  
971 WL, Conception and design, Acquisition of data, Analysis and interpretation of data, Drafting or revising  
972 the article; NK, Conception and design, Analysis and interpretation of data, Drafting or revising the article;  
973 GF, Conception and design, Analysis and interpretation of data, Drafting or revising the article.

974  
975

976 **Competing interests**

977  
978 The authors declare no competing interests.

979  
980
